1  
2  
3  
4  
5  
6  
7  
8  
9  
10  
11  
12  
13  
14  
15  
16  
17  
18  
19  
20  
21  
22  
23  
24  
25  
26  
27

## **Identifying, Protecting and Managing Stopover Habitats for Wild Whooping Cranes on U.S. Army Corps of Engineers Lakes**

Chester McConnell  
Friends of the Wild Whoopers  
8803 Pine Run  
Spanish Fort, Alabama, 36527, USA  
wmicmc@bellsouth.net

Abstract – The Whooping Crane (*Grus americana*) is one of North America’s most endangered species. There is only one wild, self-sustaining migratory population of Whooping Cranes, the Aransas–Wood Buffalo population (AWBP). The birds of the AWBP migrate 4,000 km twice each year between their nesting grounds in northern Canada and their wintering grounds on the Texas Gulf Coast. During migration, AWBP Whooping Cranes must land at suitable ponds or wetlands to forage, rest or roost. The Whooping Crane Recovery Plan, developed by federal wildlife agencies in Canada and the USA, calls for the protection and management of Whooping Crane stopover locations within the migration corridor. Although major stopover areas have been protected, many other smaller sites remain to be identified. However, the Recovery Plan offers no specific entity to identify, protect and manage the latter. To address these deficiencies in information and activity, Friends of the Wild Whoopers partnered with the United States Army Corps of Engineers (USACE) within the AWBP migration corridor to share information about Whooping Cranes and their habitat needs and identify potential stopover locations on USACE properties that could be protected and managed for cranes. This partnership identified 624 potential stopover sites on 34 USACE lakes, principally in North and South Dakota, Nebraska, Kansas, Oklahoma and Texas, with commitments to manage the habitats as resources allow.

McConnell

## 28 INTRODUCTION

29 The Whooping Crane (*Grus americana*) is one of North America’s most threatened  
30 species (reviewed in French et al., 2019). It is considered *endangered* in both Canada and the  
31 USA, and is similarly categorized as *endangered* on the International Union for Conservation of  
32 Nature’s Red List of Threatened Species. It is a large bird, North America’s tallest, and also an  
33 ‘umbrella species,’ which means that by preserving the Whooping Crane and its habitat, many  
34 other species of birds and non-avian wildlife will also benefit. Several decades of captive  
35 breeding and reintroduction efforts have not yet produced self-sustaining offshoot populations of  
36 Whooping Cranes in the United States.

37 There remains only one wild, self-sustaining migratory population of Whooping Cranes,  
38 the Aransas-Wood Buffalo population (AWBP). This population nests and raises its chicks in  
39 Canada’s Wood Buffalo National Park in northern Alberta and the Northwest Territories (April –  
40 October) and winters on or near Aransas National Wildlife Refuge in Texas (October – April).  
41 The birds of the AWBP migrate 4,000 km twice each year between their nesting and wintering  
42 areas (Kuyt, 1992). The migration route takes them through two prairie provinces (Alberta and  
43 Saskatchewan) and six principal states in the Great Plains (North Dakota, South Dakota,  
44 Nebraska, Kansas, Oklahoma and Texas) (**Figure 1**). During migration, Whooping Cranes must  
45 land at any suitable wetland area when they get tired, when severe weather occurs or before  
46 nightfall. These stopover sites are important because they provide cranes with foraging  
47 opportunities and safe nocturnal roosts. Pearse et al. (2017) used GPS data from tagged AWBP  
48 Whooping Cranes to categorize the stopover habitats in the Great Plains portion of the migration  
49 corridor as follows: 50% emergent wetlands (e.g., small ponds with herbaceous vegetation), 25%  
50 lacustrine wetlands (e.g., lakes, reservoirs, impoundments), 20% riverine, and 5% dryland (“sites

McConnell

51 without discernible surface water”, but rarely used for more than one night). Clearly, AWBP  
52 Whooping Cranes are highly dependent on wetland habitats during their twice-yearly long-  
53 distance migrations.

54 Since 1941, the AWBP has increased from 15 birds (Allen, 1952) to an estimated 506 as  
55 of winter 2019–2020 (United States Fish and Wildlife Service, 2020). Despite the increasing  
56 population size, the Whooping Cranes of the AWBP remain vulnerable to habitat destruction and  
57 gunshot. During the 200-year period from 1780 to 1980, wetland acreage in the Whooping Crane  
58 migration corridor within the United States declined by over 6 million ha (see Dahl, 1990, 2000).  
59 These habitats continue to be lost or degraded due to a variety of human activities, including  
60 wetland drainage (Samson et al., 2004), intensified farming and other changes to agricultural  
61 programs (Matson et al., 1997; Stehn and Pioto, 2008), and construction of wind energy facilities  
62 and power transmission lines (Pearse et al., 2016; Derby et al., 2018). Climate change is also  
63 likely to further reduce the stopover habitats available for Whooping Cranes (Chavez-Ramirez  
64 and Wehtje, 2012).

65 The Whooping Crane Recovery Plan (Canadian Wildlife Service and U.S. Fish and  
66 Wildlife Service, 2007) includes numerous references to wetlands known to be used as migration  
67 stopover sites. Important stopover sites in the United States include the Platte River bottoms near  
68 Kearney, Nebraska; Cheyenne Bottoms State Waterfowl Management Area and Quivira NWR in  
69 central Kansas; and Salt Plains NWR in northern Oklahoma (Figure 1C). These large sites have  
70 been designated as *critical habitat* for conservation of the Whooping Crane (United States  
71 Department of the Interior, 2017), but other stopover areas have also been identified, both large  
72 (Austin and Richert, 2001) and small (e.g., Pearse et al., 2017). Moreover, Whooping Cranes are  
73 not site-specific each migration and rarely use the same wetlands year to year (Pearse et al.,

McConnell

74 2018; 2020). Indeed, their selection of stopover locations may in part be influenced by year-to-  
75 year changes in wetlands availability (e.g., dependent on precipitation). Furthermore, there is  
76 evidence that Whooping Crane flock sizes may be increasing at some stopover locations,  
77 outpacing the overall growth of the AWBP, which may be an indicator of limited stopover  
78 habitat availability in those areas (Caven et al., 2020). Large aggregations of Whooping Cranes  
79 may increase the risk of catastrophic loss, e.g., from disease or adverse weather events (Caven et  
80 al., 2020). For these reasons, Friends of the Wild Whoopers (FOTWW), a 501(c)(3)  
81 organization, emphasizes that numerous other smaller stopover sites are also essential to ensure  
82 diverse opportunities for potential stopover use along the migration corridor.

83 As we noted previously (McConnell, 2018), the Whooping Crane Recovery Plan calls for  
84 the protection of existing wetlands as Whooping Crane stopover areas and the enhancement of  
85 those wetlands that have been degraded by woody plant encroachment, silting, and/or draining  
86 within the migratory corridor. An outline of recovery actions to achieve objectives is explained  
87 in the Recovery Plan (Canadian Wildlife Service and U.S. Fish and Wildlife Service, 2007).  
88 These actions include identifying, protecting, managing, and creating habitat. More specifically,  
89 the Recovery Plan (section 1.5.3.2.) highlights the need to “Ensure long-term protection of  
90 migration stopover sites. Work with landowners to ensure migration habitat remains suitable for  
91 cranes. Pursue stewardship agreements and conservation easements when needed, focusing on  
92 providing wetland mosaics” (page 49). However, the Recovery Plan offered no specific entity to  
93 protect and manage potential stopover sites.

94 Within the United States’ portion of the migratory corridor, FOTWW could find no  
95 ongoing concerted effort that focuses on protection or enhancement of many potential stopover

McConnell

96 areas (McConnell, 2018). Private conservation groups (e.g., Ducks Unlimited) and government  
97 agencies have played a significant role in protecting wetlands used by waterfowl and many other  
98 wildlife species throughout the AWBP Whooping Crane migration corridor. For example, funds  
99 from the sale of Duck Stamps have helped protect over 2.4 million ha of wetlands in the United  
100 States (National Wildlife Refuge Association, 2017), but many of those areas are managed for  
101 waterfowl in ways that may not be suitable for cranes (e.g., presence of tall emergent vegetation  
102 around the wetland perimeter or deeper water that would deter cranes from roosting). The most  
103 expensive part of establishing or improving habitat is land cost. If stopover habitat projects can  
104 be undertaken on government or tribal land (Indian Reservations), the cost would be relatively  
105 minimal. To address these deficiencies in information and activity, FOTWW initiated a survey of  
106 entities with large land holdings that could possibly provide additional stopover areas for  
107 migrating AWBP Whooping Cranes.

108         The first two phases of the project evaluated potential stopover habitat on 14 U.S.  
109 military bases and 7 Indian Reservations within the U.S. portion of the AWBP Whooping Crane  
110 migration corridor (McConnell, 2018). Here we report the results of phase 3, where FOTWW  
111 partnered with the U.S. Army Corps of Engineers (USACE) to evaluate Whooping Crane  
112 potential stopover habitats on USACE lake properties within the migration corridor (USACE  
113 districts Omaha, Kansas City, Tulsa, Fort Worth and Galveston). The USACE provides national  
114 leadership in the development, management, conservation and restoration of the nation's water  
115 resources and provides real estate services for the agencies of the U.S. Department of Defense.

116

117

McConnell

## 118 **METHODS**

119 FOTWW and USACE developed a Memorandum of Understanding (MOU), effective 15  
120 April 2018, to evaluate USACE lake properties for potential Whooping Crane stopover habitat.  
121 The project involves properties in six states through which the core-intensity Whooping Crane  
122 migration corridor passes — North Dakota, South Dakota, Nebraska, Kansas, Oklahoma and  
123 Texas — and one state, Montana, where low-intensity use by Whooping Cranes has been  
124 recorded (Figure 1) (Pearse et al., 2015; 2018; 2020). USACE lakes within the seven-state core  
125 migration corridor — there are 36 USACE lakes in total — are likely to become even more  
126 important to Whooping Cranes in the near future owing to the lakes' prime locations and the  
127 managed water impoundment that ensures availability of wetlands habitat. These reservoirs will  
128 be especially vital when other stopover sites are lost to drought caused by climate change.

129 Included as part of the MOU (an unclassified USACE document) were the following  
130 conservation goals:

### 131 *Article IV – Understanding of the parties*

- 132 • The USACE and the FOTWW desire to conserve freshwater, estuarine and coastal water  
133 resources, and natural communities inhabited by Whooping Cranes and other associated  
134 native wildlife. (Section 1)
- 135 • The USACE and the FOTWW desire to promote innovative thinking about conservation  
136 needs of Whooping Cranes to maintain healthy water resources and associated natural  
137 communities. (Section 2)

McConnell

- 138       • Subject to the availability of resources and in accordance with applicable laws,  
139 regulations, Army policies, and FOTWW policies; the USACE and the FOTWW desire  
140 to conduct habitat assessments, develop recommendations, and conduct demonstration  
141 projects to improve Whooping Crane stopover habitat, roosting habitat and wintering  
142 habitat. (Section 5)

143 *Article V – Responsibilities*

- 144       • The USACE and the FOTWW will cooperate in identifying opportunities to promote the  
145 conservation and/or restoration of Whooping Crane stopover habitat, water resources and  
146 natural ecosystems both on a project-specific level and on a national level along the  
147 migration corridor of the Whooping Cranes, consistent with the USACE mission and  
148 authorities to protect water resources. These opportunities may include identifying  
149 possible stopover habitat, surveying during the migration season for the presence of  
150 Whooping Cranes, developing Whooping Crane stopover habitat and other efforts to  
151 assist the USACE in executing its responsibilities under its authorities. (Section 5)

152       The criteria used by FOTWW to identify suitable Whooping Crane stopover habitat were  
153 as per McConnell (2018), as follows:

- 154       • Lake, pond, wetland at least 0.12 ha;  
155       • Lake, pond, wetland with a shallow area 12-25 cm deep for roosting;  
156       • Glide path (for Whooping Cranes to land near the water body) is clear of obstructions  
157 (e.g., power lines);

McConnell

- 158       • No thick vegetation or trees near the landing site: open landscapes allow Whooping  
159       Cranes to easily locate the ponds and provide for ready observation of any predator  
160       threats;
- 161       • Gradual or gentle slope into the water where it is shallow;
- 162       • Little or no emergent/submerged vegetation in the potential roost area;
- 163       • Extensive horizontal visibility from the potential roost site;
- 164       • At least 275 m from human development or disturbance.

165       Prior to visiting each USACE lake property, FOTWW analyzed satellite images (Google  
166       Earth) to identify locations of potential stopover habitat for Whooping Cranes, by applying the  
167       above criteria. Numerous candidate stopover locations were identified in this way for subsequent  
168       evaluation on the ground. The field trips allowed FOTWW not only to engage with local ‘lake  
169       managers’ and biologists about Whooping Crane biology and conservation needs, but also to  
170       ground truth the locations we had viewed on the satellite imagery. On-site interviews with lake  
171       personnel as well as FOTWW observations made during the lake evaluations informed our  
172       understanding of any ongoing wildlife habitat management programs. Some land and water  
173       management reports were also provided to FOTWW. Site visits were conducted by vehicle or by  
174       boat (n=8; see Table 1) during daylight and typically lasted 8-10 hours.

175

176

177

178



McConnell

179 **RESULTS**

180 FOTWW conducted field trips on 34 USACE properties in seven states from August  
181 2015 to September 2019 (see **Table 1; Figures 2-4**). Three USACE lake properties (Addicks,  
182 Barker and Wallisville, all near Houston, Texas; Figure 4) which were included as ‘military  
183 bases’ in McConnell (2018) are mentioned again here for completeness.

184 FOTWW discussed Whooping Crane biology, habitat management needs and specific  
185 management practices with USACE (and sometimes state) wildlife biologists during the field  
186 trips. We then developed detailed management recommendations for each lake to protect,  
187 improve or develop potential Whooping Crane stopover habitats and provided detailed reports  
188 for each USACE property explaining our management recommendations (summarized in Table  
189 1). Copies of FOTWW recommendations, in the form of written reports, were provided to all  
190 personnel involved.

191 Of the 34 lakes we visited, many had sites that already met FOTWW stopover habitat  
192 criteria or needed only inexpensive management practices to become suitable for migrating  
193 Whooping Cranes, e.g., by cutting dense vegetation around the edge of the lakes (e.g., Canton  
194 Lake, OK, Procter Lake, TX, Belton Lake, TX, Stillhouse Hollow Lake, TX, among others;  
195 Table 1). Importantly, FOTWW estimated that 624 potential stopover wetland habitats on these  
196 34 lakes could be used by Whooping Cranes by undertaking varying degrees of habitat  
197 management. Indeed, we learned retrospectively that many of the lake properties we visited have  
198 records of Whooping Crane use (Table 1), thereby supporting the efficacy of our approach.  
199 However, some lakeside locations are not useful for Whooping Cranes because of proximity to  
200 human disturbance (e.g., Lewisville Lake, TX); or steep and rocky shorelines (e.g., Skiatook

McConnell

201 Lake, OK); or cattails, bushes (e.g., buttonbush, *Cephalanthus occidentalis*) and trees are  
202 currently thick along the shore areas (see Table 1). On these latter locations, FOTWW  
203 recommends that they be managed for other wildlife species that prefer dense vegetative cover.  
204 Indeed, FOTWW contends that it is not necessary or desirable to modify or manage all wetlands  
205 for Whooping Cranes, but rather to focus on a subset with the best habitats and surrounding  
206 landscape characteristics.

207

208

209

210

211

212

213

214

215

216

217

McConnell

218 **DISCUSSION**

219           The development and management of stopover habitat for AWBP Whooping Cranes as  
220 recommended by FOTWW would not be expensive, because USACE already owns the land and  
221 waters where these stopover habitats are located. As an important outcome of our site visits,  
222 USACE officials were encouraged to protect and manage the identified wetlands as part of the  
223 USACE Environmental Stewardship Program. All USACE personnel advised that they intended  
224 to implement our recommendations over time as funding and time permits. Indeed, the USACE  
225 has environmental laws and regulations that it must follow (McConnell, 2018). For example, in  
226 accordance with the Endangered Species Act of 1973, as amended, the Army must assist in  
227 recovery of all listed threatened and endangered species and their habitats under the Army's land  
228 management authority. Importantly, the Sikes Improvement Act of 1977 (16 U.S.C.670) requires  
229 the Secretary of Defense to carry out a program to provide for the conservation and rehabilitation  
230 of natural resources on lands used for military mission activities. Furthermore, the Migratory  
231 Bird Treaty Act (16 U.S.C.703-712) requires protection of migratory birds. Based on FOTWW  
232 observations, the USACE personnel we met with are using all these legal authorities to manage  
233 lands in a manner beneficial to many species of wildlife, including Whooping Cranes.

234           Since we completed the USACE phase of our evaluation, about one quarter of the land  
235 managers have contacted FOTWW to discuss management practices in more depth. Moreover,  
236 personnel at the USACE Engineer Research and Development Center's Environmental  
237 Laboratory and USACE Headquarters have begun working closely with the US Geological  
238 Survey to analyze multiple years and thousands of GPS satellite tag locations to confirm  
239 significant use of USACE land and water as stopover habitat within the AWBP Whooping Crane

McConnell

240 migration corridor. In support of the MOU and in accordance with USACE responsibilities, the  
241 USACE has committed to identifying measures to maintain existing stopover habitat, improving  
242 habitat where possible, coordinating with the USFWS under the Endangered Species Act in the  
243 context of potential habitat improvement projects, and annual monitoring of habitat use by  
244 Whooping Cranes to evaluate the effectiveness of habitat maintenance and restoration projects.  
245 Moreover, because the lands and waters are USACE properties, the cost of stopover habitat  
246 enhancement and management will be relatively minor.

247           So, what did FOTWW accomplish on the USACE lake properties? As with the military  
248 bases and Indian Reservations (McConnell, 2018), awareness and interest in Whooping Cranes  
249 by natural resource personnel was significantly increased, as was their desire to help endangered  
250 Whooping Cranes. USACE personnel were encouraged to protect and manage several hundred  
251 potential stopover wetlands identified by FOTWW, thus targeting some of the major unmet  
252 objectives described in the Whooping Crane Recovery Plan, which include identifying,  
253 protecting, managing, and creating stopover habitat for Whooping Cranes. FOTWW contends  
254 that wild AWBP Whooping Cranes are capable of taking care of themselves, with two  
255 exceptions. They need people to protect their wetland habitats and to protect them from gunshot.

256

257

258

259

260

McConnell

261 **ACKNOWLEDGMENTS**

262 I sincerely appreciate the interest and cooperation of all the outstanding USACE  
263 personnel during our evaluation of potential AWBP Whooping Crane stopover habitats on  
264 USACE properties. I am particularly grateful to David Hoover, Conservation Biologist, Kansas  
265 City, Missouri, USACE, who arranged our visits and provided documents that assisted in our  
266 evaluations. David also graciously prepared the maps used in figures 2, 3 and 4. Lastly, I thank  
267 Daryl S. Henderson, Ph.D., for editing assistance on this paper. The findings and conclusions in  
268 this paper are those of FOTWW.

269

270

271

272

273

274

275

276

277

278

279

McConnell

280 **REFERENCES**

- 281 Allen, RP (1952) The Whooping Crane. Research Report No. 3 of the National Audubon  
282 Society. National Audubon Society, New York.
- 283 Austin JE, Richert AL (2001) A comprehensive review of observational and site evaluation data  
284 of migrant whooping cranes in the United States, 1943-1999. U.S. Geological Survey, Reston,  
285 Virginia.
- 286 Canadian Wildlife Service, U.S. Fish and Wildlife Service (2007) International recovery plan for  
287 the whooping crane. Recovery of Nationally Endangered Wildlife (RENEW), Ottawa, Ontario,  
288 Canada, and U.S. Fish and Wildlife Service, Albuquerque, New Mexico, USA.
- 289 Caven AJ, Rabbe M, Malzahn J, Lacy AE (2020) Trends in the occurrence of large whooping  
290 crane groups during migration in the great plains, USA. *Heliyon* e03549
- 291 Chavez-Ramirez F, Wehtje W (2012) Potential impact of climate change scenarios on whooping  
292 crane life history. *Wetlands* 32:11-20.
- 293 Dahl TE (1990) Wetland losses in the United States 1780's to 1980's. U.S. Department of the  
294 Interior. Fish and Wildlife Service, Washington, D.C.
- 295 Dahl TE (2000) Status and trends of wetlands in the conterminous United States 1986 to 1997.  
296 U.S. Department of the Interior, Fish and Wildlife Service, Washington, D.C.
- 297 Derby CE, Welsch MM, Thorn TD (2018) Whooping crane and sandhill crane monitoring at five  
298 wind energy facilities. *Proceedings of the North American Crane Workshop* 14:26-34.
- 299 French JB, Jr, Converse SJ, Austin JE (eds.) (2019) *Whooping Cranes: Biology and*  
300 *Conservation*. Academic Press, Elsevier.

McConnell

- 301 Kuyt, E (1992) Aerial radio-tracking of Whooping Cranes migrating between Wood Buffalo  
302 National Park and Aransas National Wildlife Refuge, 1981-84. Occasional Paper Number 74,  
303 Canadian Wildlife Service.
- 304 Matson PA, Parton WJ, Power AG, Swift MJ (1997) Agricultural intensification and ecosystem  
305 properties. *Science* 277:504-509.
- 306 McConnell CA (2018) Working with land managers to identify and manage potential stopover  
307 locations for whooping cranes. *Proceedings of the North American Crane Workshop* 14:126-131.  
308 National Wildlife Refuge Association (2017)  
309 <http://refugeassociation.org/advocacy/funding/land-conservation/duck-stamp/>
- 310 Pearse AT, Brandt DA, Harrell WC, Metzger KL, Baasch DM, Hefley TJ (2015) Whooping  
311 crane stopover site use intensity within the Great Plains. U. S. Geological Survey Open-File  
312 Report 2015-1166.
- 313 Pearse AT, Brandt DA, Krapu GL (2016) Wintering sandhill crane exposure to wind energy  
314 development in the central and southern Great Plains, USA. *Condor* 118:391-401.
- 315 Pearse AT, Harner MJ, Baasch DM, Wright GD, Caven AJ, Metzger KL (2017) Evaluation of  
316 nocturnal roost and diurnal sites used by whooping cranes in the Great Plains, United States.  
317 U.S. Geological Survey Open-File Report 2016-1209.
- 318 Pearse AT, Metzger KL, Brandt DA, Bidwell MT, Harner MJ, Baasch DM, Harrell W (2020)  
319 Heterogeneity in migration strategies of whooping cranes. *Condor* 122:1-15.
- 320 Pearse AT, Rabbe M, Juliusson LM, Bidwell MT, Craig-Moore L, Brandt DA, Harrell W (2018)  
321 Delineating and identifying long-term changes in the whooping crane (*Grus americana*)  
322 migration corridor. *Plos One* 13(2): e0192737.

McConnell

- 323 Samson FB, Knopf FL, Ostlie WR (2004) Great Plains ecosystems: past, present, and future.  
324 Wildlife Soc. B. 32:6-15.
- 325 Stehn TV, Prieto F (2010) Changes in winter whooping crane territories and range 1950-2006.  
326 Proceedings of the North American Crane Workshop. 11:40-56.
- 327 United States Department of the Interior (2017) Final critical habitat for the whooping crane  
328 (*Grus americana*). [https://catalog.data.gov/dataset/final-critical-habitat-for-the-whooping-crane-](https://catalog.data.gov/dataset/final-critical-habitat-for-the-whooping-crane-grus-americana)  
329 [grus-americana](https://catalog.data.gov/dataset/final-critical-habitat-for-the-whooping-crane-grus-americana).
- 330 United States Fish and Wildlife Service (2020) Annual Whooping Crane Survey, Aransas  
331 National Wildlife Refuge.  
332
- 333 **Key Words:** Aransas–Wood Buffalo population, Great Plains, *Grus americana*, lake, migration,  
334 pond, stopover habitat, reservoir, USACE, wetland, whooping crane  
335



McConnell

336 Table 1. USACE lakes visited by FOTWW to identify potential stopover locations that could be  
337 managed for migrating Whooping Cranes of the Aransas–Wood Buffalo Population. Lakes are  
338 listed by state and from highest to lowest latitude.

| USACE lake               | Date of visit | Comments                                                                                                                                                                                                                                                                                                                                               |
|--------------------------|---------------|--------------------------------------------------------------------------------------------------------------------------------------------------------------------------------------------------------------------------------------------------------------------------------------------------------------------------------------------------------|
| 1. Fort Peck Lake, MT    | Sep 2019      | Fifth largest artificial lake in the USA, extending ~200 km along the Missouri River, with a twisting shoreline of ~2,446 km; FOTWW traveled 103 km by boat on the lake to observe some of the shore areas; numerous high-quality potential stopover sites; estimate ~1 site per 3.2 km of lake shoreline visited; outside the core migration corridor |
| 2. Lake Sakakawea, ND    | Sep 2019      | Largest USACE lake in the USA, 286 km long, 3,032 km of shoreline; contains 1/3 of the water stored by the Missouri River mainstem reservoir system; Least Tern and Piping Plover nest on the lake's sandbars; abundant excellent stopover habitat potential; used by Whooping Cranes                                                                  |
| 3. Pipestem Lake, ND     | Sep 2019      | Has a small conservation pool with ~23 km of shoreline; observed white pelicans, egrets, Killdeer; ~35% of the shore area would be good stopover habitat                                                                                                                                                                                               |
| 4. Lake Oahe, ND/SD      | Sep 2019      | ~3,600 km of shoreline; extensive long, wide, open beaches; sandbars, shallow water; shallow wetlands; nearby agricultural fields; power lines require marking; used by Whooping Cranes                                                                                                                                                                |
| 5. Lake Sharpe, SD       | Sep 2019      | ~320 km of shoreline; important stopover location for waterfowl, shorebirds, waders; adjacent to Crow Creek and Lower Brule Indian Reservations, previously visited by FOTWW (McConnell, 2018); used by Whooping Cranes                                                                                                                                |
| 6. Lake Francis Case, SD | Sep 2019      | ~865 km of shoreline; extensive long, wide, open beaches; sandbars, shallow water; shallow wetlands; nearby agricultural fields; phragmites is a problem and control efforts are ongoing; power lines require marking; used by Whooping Cranes                                                                                                         |

McConnell

- |                                |          |                                                                                                                                                                                                                                                                                                                                                                             |
|--------------------------------|----------|-----------------------------------------------------------------------------------------------------------------------------------------------------------------------------------------------------------------------------------------------------------------------------------------------------------------------------------------------------------------------------|
| 7. Lewis and Clark Lake, SD/NE | Sep 2019 | ~145 km of shoreline; some good potential stopover habitat; Least Tern and Piping Plover conservation program; phragmites is extensive but control efforts are ongoing; used by Whooping Cranes                                                                                                                                                                             |
| 8. Harlan County Lake, NE      | Oct 2017 | ~120 km of shoreline with many shallow areas offering excellent potential stopover habitat; used by large numbers of waterfowl in migration; USACE's Agricultural Lease Program on nearby fields ensures abundant food and cover for wildlife; used by Whooping Cranes                                                                                                      |
| 9. Milford Lake, KS            | Nov 2017 | 10 wetland complexes (~930 ha) and adjacent agricultural fields jointly managed by USACE and KDWPT; used by large numbers of waterbirds, including Whooping Cranes                                                                                                                                                                                                          |
| 10. Wilson Lake, KS            | Nov 2017 | ~39 km max. length; ~160 km of shoreline; ~5,260 ha of adjacent land managed by USACE or KDWPT (Wilson Wildlife Area), including native prairie and cropland; used by Whooping Cranes                                                                                                                                                                                       |
| 11. Kanopolis Lake, KS         | Oct 2017 | ~19 km max. length; ~66 km of shoreline; outstanding wildlife and habitat management programs on 4,450 ha of adjacent lands; used by Whooping Cranes                                                                                                                                                                                                                        |
| 12. Kaw Lake, OK               | Oct 2018 | High flood waters prevented a thorough on-the-ground evaluation, but satellite images revealed 3 potential stopover sites (sandbars), all in the upstream river that feeds the lake; the main pool's shore areas are mostly steep, with abundant trees growing close to the lake edge, so not suitable as stopover habitat; at least one recorded visit by a Whooping Crane |
| 13. Fort Supply Lake, OK       | Oct 2018 | High flood waters prevented a thorough evaluation of this 723-ha lake, with ~42 km of shoreline, but several good stopover sites were identified by boat; adjacent lands (~2,430 ha) managed by USACE and ODWC for hunting; used by Whooping Cranes                                                                                                                         |
| 14. Skiatook Lake, OK          | Oct 2018 | ~4,125 ha at normal pool; mostly steep and rocky topography, narrow shores, near-shore trees; 3 areas of good potential stopover habitat (e.g., Tall                                                                                                                                                                                                                        |

McConnell

|                          |          |                                                                                                                                                                                                                                                       |
|--------------------------|----------|-------------------------------------------------------------------------------------------------------------------------------------------------------------------------------------------------------------------------------------------------------|
|                          |          | Chief Cove); ~3,160 ha of adjacent land, including agricultural fields                                                                                                                                                                                |
| 15. Canton Lake, OK      | Oct 2018 | ~72 km of shoreline; several potential stopover habitat areas identified, some in need of vegetation removal; ~6,070 ha of adjacent land managed by ODWC for hunting; used by Whooping Cranes                                                         |
| 16. Ray Roberts Lake, TX | Jul 2019 | ~11,900 ha; ~1/4 of the lake evaluated by boat (Tioga area); many potential stopover locations, beaches with gentle slopes into shallow water; some vegetation management require; leased to TPWD                                                     |
| 17. Jim Chapman Lake, TX | Jul 2019 | ~7,800 ha impoundment (Cooper Dam); 11,700 ha of public land, half leased to TPWD; typical shoreline of steep banks and trees, but exposed mudflats in spring and fall months; vegetation on levees should be mowed                                   |
| 18. Lewisville Lake, TX  | Jul 2019 | ~11,975 ha impoundment, mostly surrounded by urban development (northwest of Dallas); toured by boat; unsuitable for stopover habitat management due to proximity to human disturbances                                                               |
| 19. Lavon Lake, TX       | Sep 2017 | ~8,660 ha lake with ~195 km of shoreline; surrounded by 6,850 ha of project land; much of the shore area is steep and not shallow enough, but some areas are suitable as stopover habitat (e.g., near Brockdale Park); visited by Whooping Cranes     |
| 20. Benbrook Lake, TX    | Sep 2017 | ~1,525 ha (normal pool); some excellent potential stopover habitat, but other areas have tall trees or are too close to human development; at least one record of a Whooping Crane at the lake, and other sightings nearby                            |
| 21. Bardwell Lake, TX    | Sep 2017 | ~40 km of shoreline, but some of it is developed for recreational use and not suitable for Whooping Cranes; some beach areas on the northeast side are potential stopover habitat, but would benefit from clearing of bushes; used by Whooping Cranes |
| 22. Procter Lake, TX     | Mar 2019 | ~1,865 ha with ~60 km of shoreline; adjacent to ~1,415 ha wildlife area; simple management of woody shrubs (mechanically or by prescribed                                                                                                             |

McConnell

|                                |          |                                                                                                                                                                                                                                                                                                                              |
|--------------------------------|----------|------------------------------------------------------------------------------------------------------------------------------------------------------------------------------------------------------------------------------------------------------------------------------------------------------------------------------|
|                                |          | burns) and removal of a few near-shore trees required; two sites offer excellent potential stopover habitat (near Sabana WMA and Sowell Creek Park beach area); at least one record of Whooping Crane use                                                                                                                    |
| 23. Navarro Mills Lake, TX     | Apr 2018 | ~2,050 ha, ~61 km of shoreline; wetlands in Units 1 and 2 have excellent stopover habitat, and could be further managed to provide additional habitat for Whooping Cranes; the north and south shores of the lake are not suitable (steep banks, dense vegetation)                                                           |
| 24. Aquilla Lake, TX           | Apr 2018 | ~1,327 ha; ~2,800 ha of USACE land surround the lake; cattle grazing; potential stopover habitat at Old School Area (excellent) and hunting area (A-7), the latter requiring vegetation management; has been used by at least one Whooping Crane                                                                             |
| 25. Whitney Lake, TX           | Apr 2018 | ~9,535 ha at normal pool; ~360 km of shoreline; ~5,460 ha of government-owned land surround the lake, dedicated as natural areas; nearby grain fields and pastures; 3 areas have excellent stopover habitat (Hunting Areas H-9 and H-10, Noland River Access); used by many species of waterbirds, including Whooping Cranes |
| 26. Hords Creek Lake, TX       | Jul 2019 | Small lake (~206-ha conservation pool), but impressive diversity, including beaver pond wetlands and abundant shore-area shallows suitable for Whooping Cranes                                                                                                                                                               |
| 27. Waco Lake, TX              | Apr 2018 | Portions of the ~2,940-ha lake are within the city limits of Waco; toured by boat; 2 islands in the lake have excellent stopover habitat; used by Whooping Cranes                                                                                                                                                            |
| 28. Belton Lake, TX            | Mar 2019 | ~4,980 ha lake, surround by ~1,580 ha or wildlife area; toured by boat; excellent stopover habitat, including sandbars, but also extensive buttonbush ( <i>Cephalanthus occidentalis</i> ) which should be removed; used by Whooping Cranes                                                                                  |
| 29. Stillhouse Hollow Lake, TX | Mar 2019 | ~2,600 ha; toured by boat; multiple excellent potential stopover sites were identified, some in need of only minor management, e.g., removal of                                                                                                                                                                              |

McConnell

|                          |          |                                                                                                                                                                                                                                                                                                                                                            |
|--------------------------|----------|------------------------------------------------------------------------------------------------------------------------------------------------------------------------------------------------------------------------------------------------------------------------------------------------------------------------------------------------------------|
|                          |          | buttonbush ( <i>C. occidentalis</i> ) near the lake's edge; used by Whooping Cranes                                                                                                                                                                                                                                                                        |
| 30. Granger Lake, TX     | Sep 2017 | ~1,780 ha conservation pool; considerable fluctuations in water level during the year, exposing large expanses of mudflats during drawdowns; excellent stopover areas (e.g., Sore Finger Wildlife Area), but some scattered near-shore trees could be removed; used by Whooping Cranes                                                                     |
| 31. Lake Georgetown, TX  | Mar 2019 | ~ 525 ha lake and ~1,215 ha land base for hunting; nearby agricultural fields; several locations could make excellent stopover habitat, needing only relatively simple improvements, e.g., woody debris clean-up, removal of buttonbush ( <i>C. occidentalis</i> ) near the lake's edge                                                                    |
| 32. Wallisville Lake, TX | Aug 2015 | ~9,300 ha; toured by boat; vast wetlands include fresh and brackish water marshes, swamps, shallow lakes and ponds; abundance of exceptional high-quality potential Whooping Crane habitat (e.g., areas off J.J. Mayes Trace and Old River Lake); ~225 km east of Aransas NWR and east of the core migration corridor, but could provide wintering habitat |
| 33. Addicks Lake, TX     | Aug 2015 | ~160 km from Aransas NWR, but east of the core migration corridor; not many areas could serve as stopover habitat in their current state because of dense forested areas surrounding ponds; other wetlands too near powerlines, roads or other human disturbances                                                                                          |
| 34. Barker Reservoir, TX | Aug 2015 | Same limitations as nearby Addicks Lake                                                                                                                                                                                                                                                                                                                    |

---

339

340 KDWPT, Kansas Department of Wildlife, Parks & Tourism; NWR, National Wildlife Refuge;  
341 ODWC, Oklahoma Department of Wildlife Conservation; TPWD, Texas Parks and Wildlife  
342 Department; WMA, Wildlife Management Area

343

344

McConnell

345 **Figure legends**

346 **Figure 1.** Migration corridors of Whooping Cranes of the Aransas–Wood Buffalo Population,  
347 showing the 50% core (A), 75% core (B), and 95% core migration areas, with 95% confidence  
348 bands [reproduced from Pearse et al. (2018), <https://doi.org/10.1371/journal.pone.0192737>,  
349 under the Creative Commons Universal Public Domain Dedication]. The illustrated corridors,  
350 running from the nesting area in Canada’s Wood Buffalo National Park to the wintering area at  
351 Aransas National Wildlife Refuge in Texas, are based on 75 years of compiled opportunistic  
352 sightings and 7 years of more recent GPS data of tagged Whooping Cranes (Pearse et al., 2018).  
353 Also indicated are areas designated as Whooping Crane *critical habitat* in the United States, and  
354 some cities and major rivers.

355 **Figure 2.** Field visit sites 1-7 in Montana, North Dakota and South Dakota. The numbers on the  
356 map correspond to the numbered USACE lake locations in Table 1. Interstate highways are  
357 labeled. Mapping source: 2020 Google, Image Landsat Copernicus. Scale bar = 320 km.

358 **Figure 3.** Field visit sites 8-15 in Nebraska, Kansas and Oklahoma. The numbers on the map  
359 correspond to the numbered USACE lake locations in Table 1. Interstate highways are labeled.  
360 Mapping source: 2020 INEGI, 2020 Google, Image Landsat Copernicus. Scale bar = 320 km.

361 **Figure 4.** Field visit sites 16-34 in Texas. The numbers on the map correspond to the numbered  
362 USACE lake locations in Table 1. Interstate highways are labeled. Mapping source: 2020 INEGI,  
363 2020 Google, Image Landsat Copernicus, Data SIO-NOAA, U.S. Navy, NGA, GEBCO. Scale  
364 bar = 320 km.

365

McConnell

366 Figure 1.

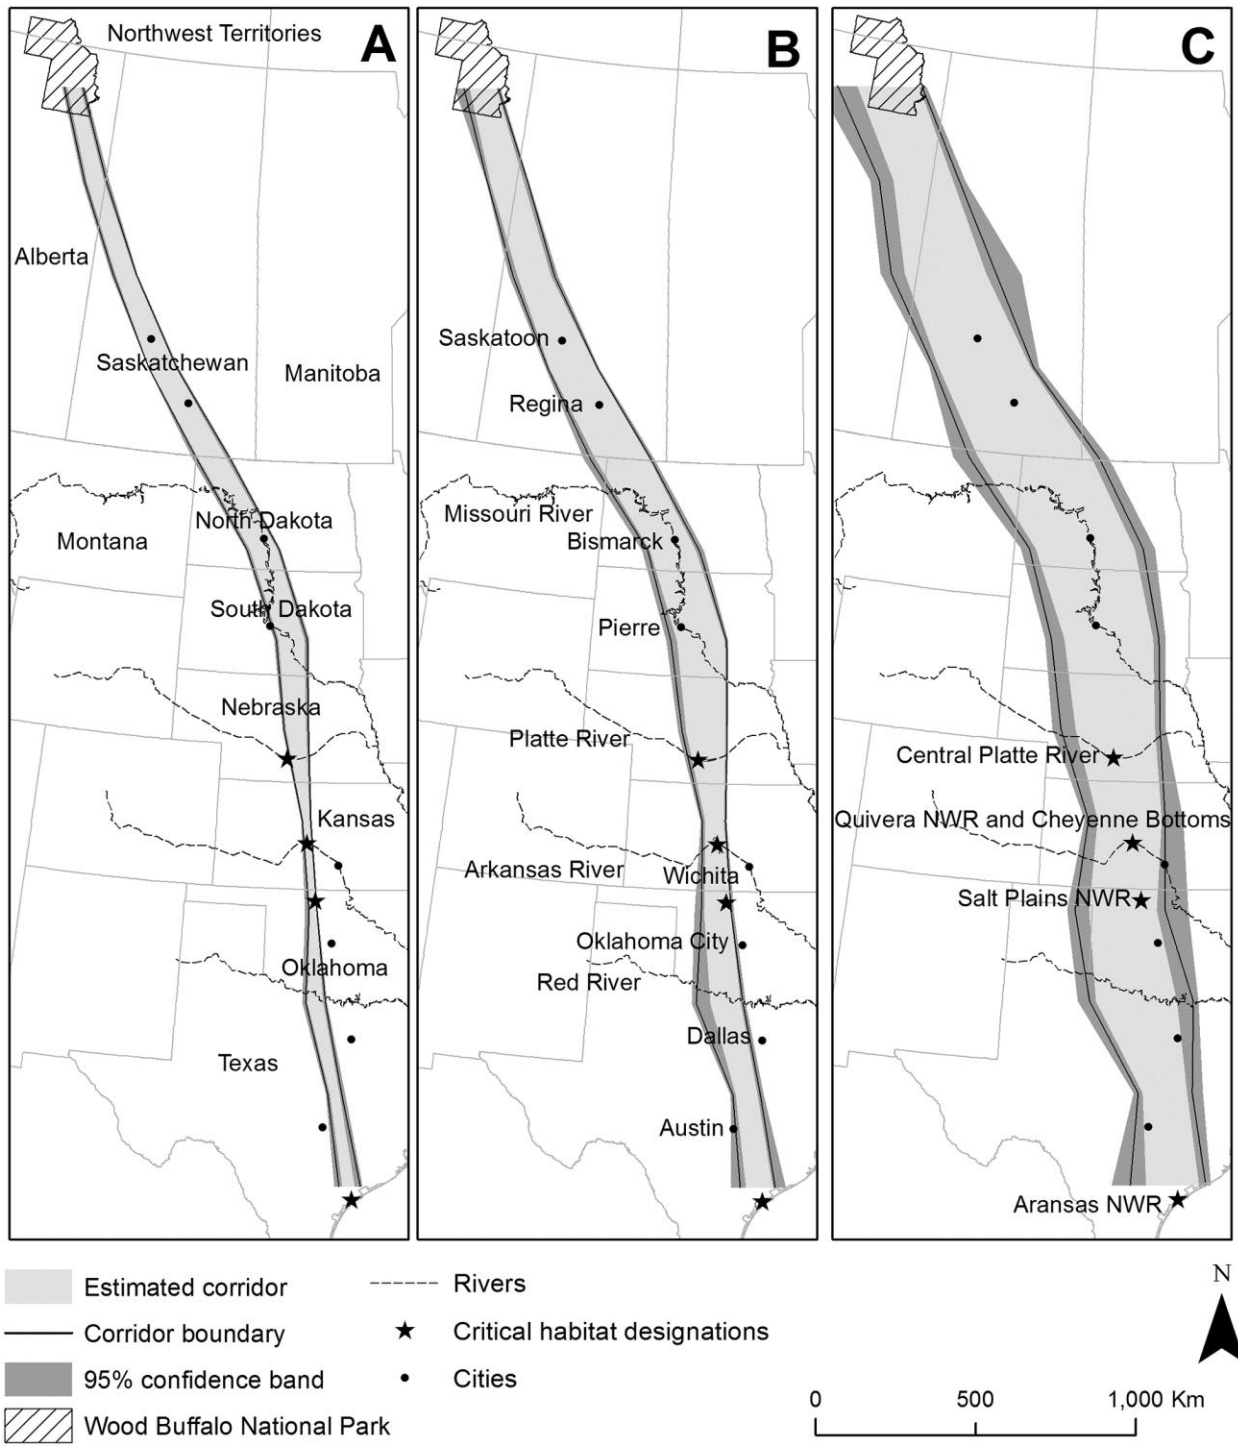

367

McConnell

368 Figure 2.

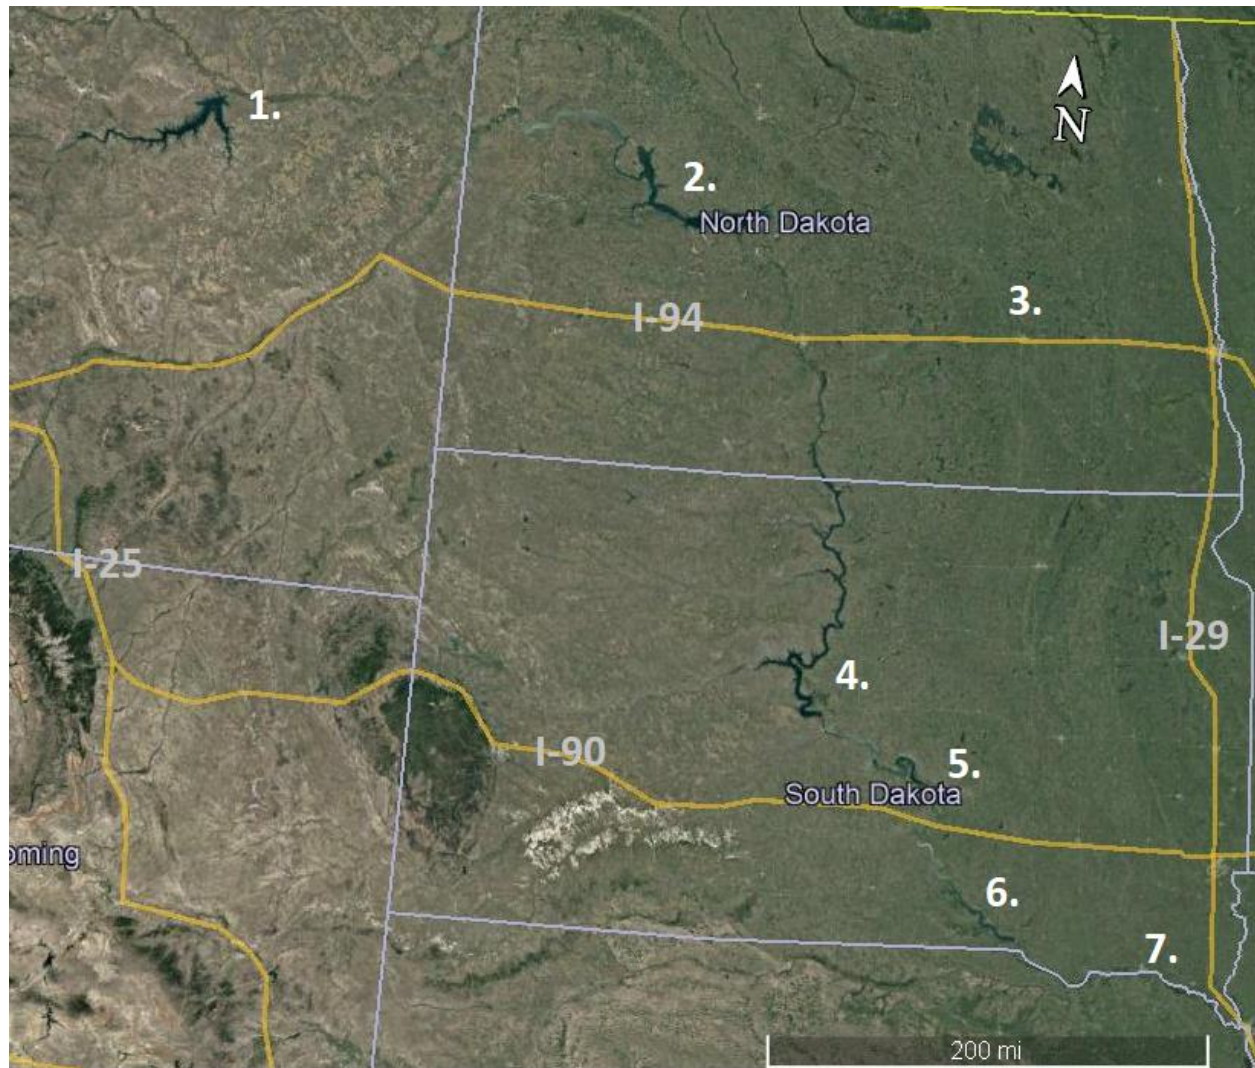

369

370



McConnell

371 Figure 3.

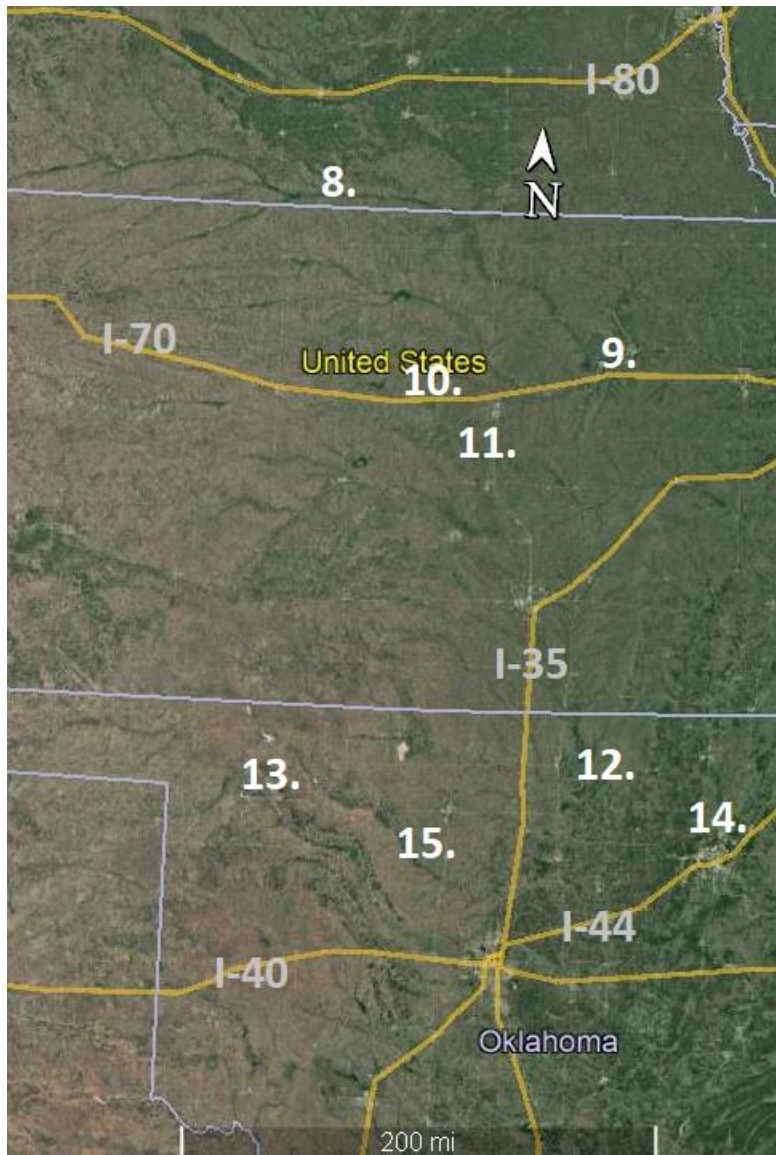

372

373

McConnell

374 Figure 4.

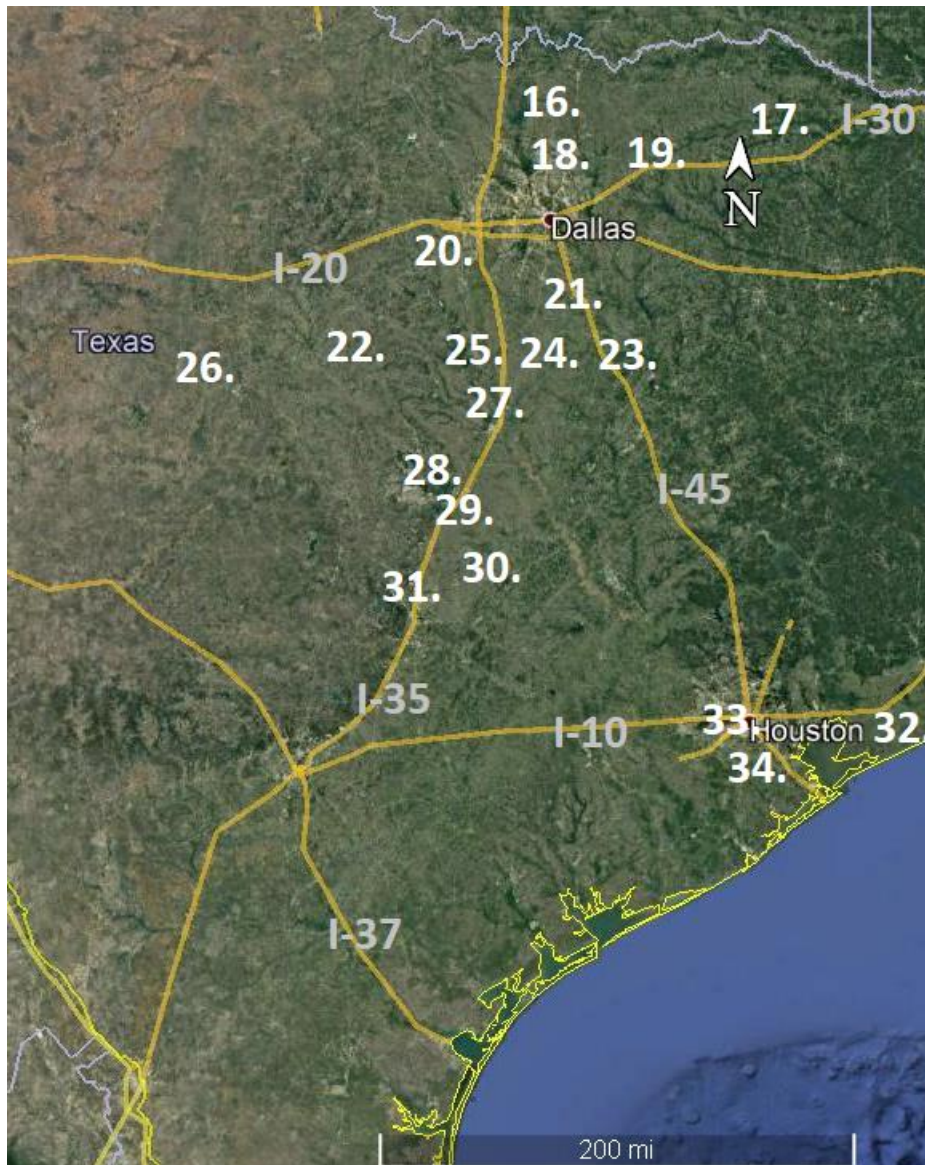

375
